# Supplementary material
Source: Springer Nature journal article supplement (https://www.springermedizin.de/resource/supplementary/12879_2008_856_MOESM1_ESM.pdf/9449934)

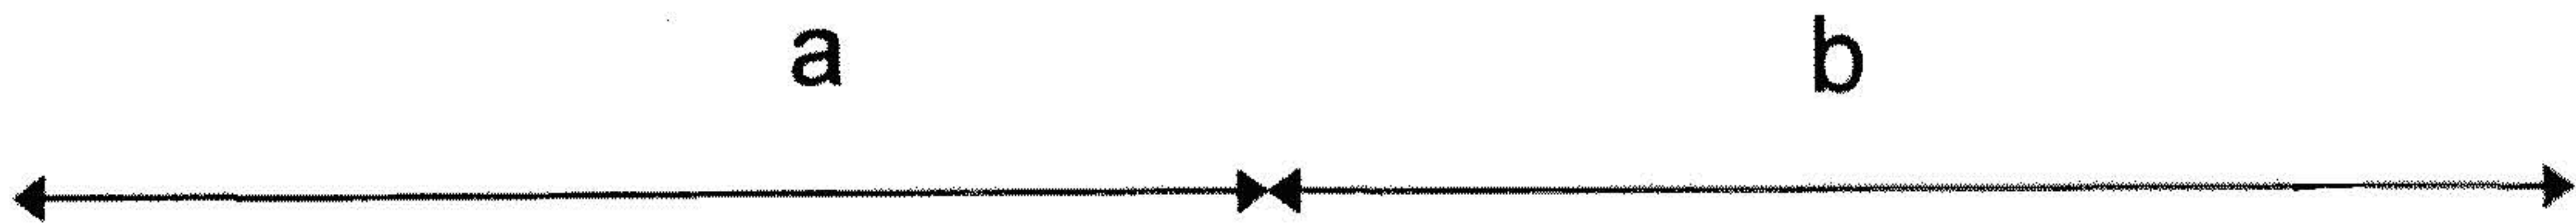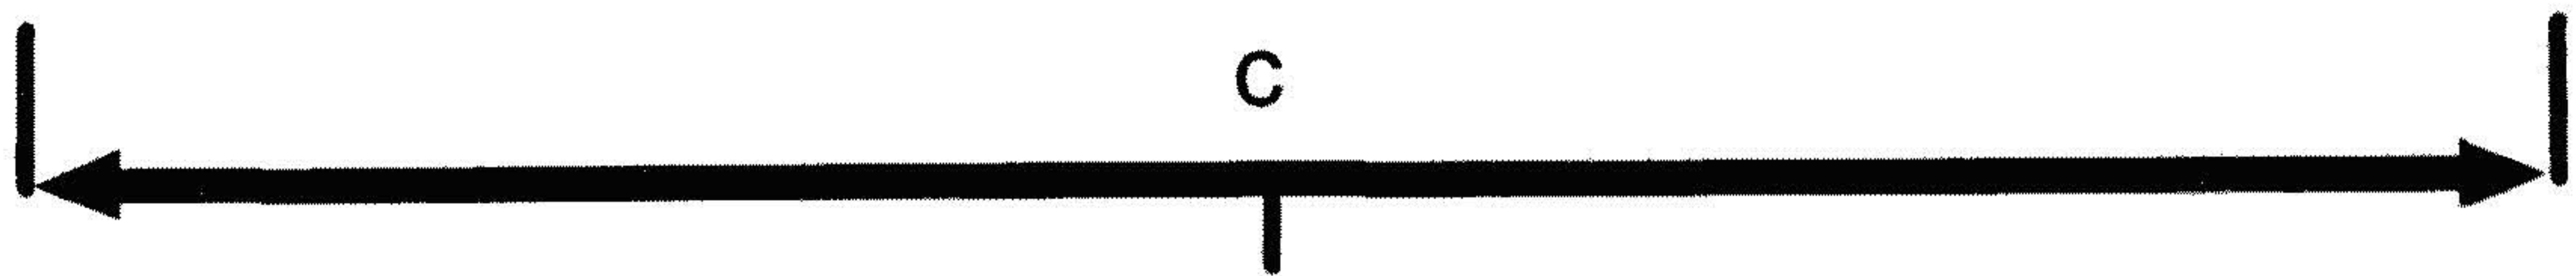

onset of  
symptoms

first  
consultation

diagnosis

Supplement: MOESM1 [file 9449934]
